# Supplementary material for: MicroRNA Profiling Can Classify Acute Leukemias of Ambiguous Lineage as Either Acute Myeloid Leukemia or Acute Lymphoid Leukemia
Source: Oxford University Press journal article supplement (doi:10.1158/1078-0432.ccr-12-3657), 2013-02-26
Supplement: 10780432ccr123657-sup-tab1-4.xlsx [file 10780432ccr123657-sup-tab1-4.xlsx]

## Sheet: Table S1
Supplementary Table 1
Literature based signature. Result of integrating lineage discriminating microRNAs previously reported.
Number	microRNA
1	hsa-let-7a
2	hsa-let-7b
3	hsa-let-7c
4	hsa-let-7e
5	hsa-miR-125a-3p
6	hsa-miR-128
7	hsa-miR-130a
8	hsa-miR-130b
9	hsa-miR-146a
10	hsa-miR-150
11	hsa-miR-151-5p
12	hsa-miR-155
13	hsa-miR-17
14	hsa-miR-196b
15	hsa-miR-199b-5p
16	hsa-miR-20a
17	hsa-miR-21
18	hsa-miR-210
19	hsa-miR-22
20	hsa-miR-221
21	hsa-miR-222
22	hsa-miR-223
23	hsa-miR-23a
24	hsa-miR-24
25	hsa-miR-27a
26	hsa-miR-27b
27	hsa-miR-29a
28	hsa-miR-29b
29	hsa-miR-29c
30	hsa-miR-335
31	hsa-miR-424
32	hsa-miR-451

## Sheet: Table S2
Supplemental Table 2.
Flow cytometric and genetic characteristics of the patients with leukemia of ambiguous lineage.
UPN	B-cel markers			T-cel markers			Myeloid markers			Monoblastic appearance	Age	WHO 2001	WHO 2008	Karyotype			t(9;22)	t(8;21)	t(15;17)	inv(16)	MLL	FLT3-ITD
B/My
3	CD79aw, cytCD22w, CD10w			CD4, CD5, CD10w			CD13, CD33, CD117, cytMPO			neg	28	B/My	AML	Complex*			neg.	neg.	neg.	neg.	neg.	norm.
6	CD19w, CD79aw, cytTDT			CD4, CD7, cytTDT			CD13, CD33, CD117, cytMPO			neg	52	B/My	AML	46,XY,t(9;22) (q34;q11.2)			Pos. e14a2#	ND	ND	ND	ND	ND
8	CD19w, CD79aw, CD10s, cytTDT			CD7, CD10s , cytTDT			CD13, CD33, cytMPO			neg	72	B/My	AML	n.a.			Pos. e13a2#	neg.	neg.	neg.	neg.	norm.
13	CD19s, CD79as, CD10s, CD20, cytTDT			CD4, CD10s, cytTDT			cytMPO			neg	65	B-ALL	B/My	Complex**			Pos. e1a2#	ND	ND	ND	neg.	ND
18	CD19s, CD10s, cytTDT			CD10s, cytTDT			cytMPO			neg	13	B-ALL	B/My	46,XX			neg.	neg.	neg.	neg.	neg.	norm.
19	CD19s, CD79as, CD10s, cytTDT			CD10s, cytTDT			CD13, cytMPO			neg	9	B/My	B/My	Complex***			neg.	ND	ND	ND	neg.	ND
21	CD19s, CD79as, CD10s, cytTDT			CD4, CD10s, cytTDT			CD13, cytMPO			neg	14	B/My	B/My	46,XY,t(9;9) (p?13;q?12)			neg.	neg.	neg.	neg.	neg.	norm.
23	CD19w, CD79aw, cytTDT			cytTDT			CD13, CD33, CD117, cytMPO			neg	1	B/My	AML	46,XX			neg.	neg.	neg.	neg.	neg.	norm.
24	CD10, CD20, cytIgM			CD7, CD10			CD13, CD33, CD117, CD15, cytMPO			neg	52	B/My	AML	46,XY			neg.	neg.	neg.	neg.	neg.	ND
27	CD19w, CD10, cytTDT			CD10, cytTDT			CD13, CD33			neg	62	B-ALL	UAL	46,XX,t(9;22)(q34;q11.2)			Pos. e1a2#	neg.	neg.	neg.	neg.	norm.
28	CD19w, CD97aw, cytCD22w, cytTDT			CD4, cytTDT			CD13, CD33, CD15, CD117, CD133, cytMPO			neg	75	B/My	AML	45,X,-Y,t(8;21)(q22;22),del(9)(q22;q32)			neg.	pos.	neg.	neg.	neg.	norm.
33	CD19s, CD79as, CD10s, cytTDT			CD4, CD10s, cytTDT			CD13, CD15, CD33, cytMPO			neg	41	B/My	B/My	46,XX,t(9;22) (q34;q11.2)			Pos. e14a2#	neg.	neg.	neg.	neg.	norm.
T/My
7	none			CD2, CD4, CD5, CD7			CD13, CD33, CD15, CD65, CD117, cytMPO			neg	72	T/My	AML	46,XY,t(3;3) (q21;q26)			neg.	neg.	neg.	neg.	neg.	norm.
12	CD10			CD2, CD4, CD5, CD7, CD10			CD13, CD33, CD117			neg	67	T/My	UAL	46,XX,t(2;3) (p23;q26),-7,+mar			neg.	neg.	neg.	neg.	neg.	norm.
22	cytTDT			CD2, CD5, CD7, CD8, cytCD3, cytTDT			cytMPO			neg	24	T-ALL	T/My	46,XY			neg.	ND	ND	neg.	neg.	ND
B/T/My
5	CD79aw, CD10w, cytTDT			cytCD3, CD2, CD4, CD5, CD7, CD8, CD10w, cytTDT			CD13, cytMPO			neg	75	B/T/My	T/My	46,XY			neg.	neg.	neg.	neg.	neg.	norm.
25	CD79aw, cytTDT			CD2, CD7, cytCD3, cytTDT			CD13, CD15, CD117, CD65			neg	16	B/T/My	T-ALL	n.a.			neg.	ND	ND	ND	neg.	ND

## Sheet: Table S3
Supplementary Table 3
Significantly discriminative microRNAs between the myeloid and lymphoid cluster.
Kolom1	d(i)	Geom mean of intensities in lymphoid leukemia	Geom mean of intensities in myeloid leukemia	Fold-change	Symbol
1	-6.331	132.3	985.5	0.13	hsa-miR-27a
2	-5.997	38.8	111.9	0.35	hsa-miR-199b-5p
3	-5.617	152.2	941.8	0.16	hsa-miR-23a
4	-5.493	38.4	109.4	0.35	hsa-miR-199a-3p
5	-5.077	603.9	6323.6	0.1	hsa-miR-223
6	-5.043	78	238.2	0.33	hsa-miR-221
7	-4.137	148.7	530.5	0.28	hsa-miR-24
8	4.119	671.5	90.2	7.45	hsa-miR-150
9	-3.541	764.5	1980	0.39	hsa-miR-21
10	3.524	893.6	484.3	1.85	hsa-miR-25
11	3.417	288.3	118.8	2.43	hsa-miR-130b
12	-3.184	48.4	83.8	0.58	hsa-miR-340
13	3.109	1238.5	678.9	1.82	hsa-miR-106b
14	-2.84	47	68.3	0.69	hsa-miR-221*
15	2.746	73.8	44.6	1.66	hsa-miR-7
16	2.661	77.2	50.2	1.54	hsa-miR-625
17	2.563	845.4	526.6	1.61	hsa-miR-142-5p
18	2.56	340.6	172.7	1.97	hsa-miR-342-3p
19	2.505	117.4	86.4	1.36	hsa-miR-590-5p
20	2.495	180	81.1	2.22	hsa-miR-128
21	-2.41	34.1	41.6	0.82	hsa-miR-181c*
22	-2.408	40.9	51.4	0.8	hsa-miR-340*
23	-2.399	167.5	587.8	0.28	hsa-miR-130a
24	-2.368	80.3	186.9	0.43	hsa-miR-146b-5p
25	2.364	60.7	48.8	1.24	hsa-miR-454
26	2.324	1039.4	598.9	1.74	hsa-miR-29c
27	2.267	207.4	138	1.5	hsa-miR-320b
28	2.192	139.4	99.1	1.41	hsa-miR-140-3p
29	2.156	238.5	164.3	1.45	hsa-miR-320e
30	2.123	47.7	37.2	1.28	hsa-miR-210
31	2.089	76.9	57.9	1.33	hsa-miR-28-5p
32	2.072	54	44	1.23	hsa-miR-342-5p
33	2.064	100.8	74	1.36	hsa-miR-320a
34	2.041	326	220.4	1.48	hsa-miR-320d
35	2.022	199.9	147.6	1.35	hsa-miR-331-3p
36	1.975	85.5	66.9	1.28	hsa-miR-185

## Sheet: Table S4a
Supplementary Table 4a
MicroRNAs differential expressed between leukemia of ambiguous lineage, AML, B-ALL and T-ALL samples analyzed by LIMMA.
#	GeneName	t-statistic values AmbigALvsAML	p-values AmbigALvsAML	False Discovery Rate AmbigALvsAML
1	hsa-miR-3607-3p	-4.26751	0.000511	0.268911
2	hsa-miR-150	4.19453	0.000599	0.268911
3	hsa-miR-181c*	-4.61366	0.000243	0.268911
4	hsa-miR-199b-5p	-3.59333	0.002216	0.722077
5	hsa-miR-181c	-3.50601	0.00268	0.722077
6	hsa-miR-151-5p	3.2747	0.004429	0.739704
7	hsa-miR-18a	3.17511	0.005491	0.739704
8	hsa-let-7f	-3.21089	0.005083	0.739704
9	hsa-miR-625	3.19329	0.00528	0.739704
10	hsa-miR-25*	3.1847	0.005379	0.739704
11	hsa-miR-611	2.98916	0.008186	0.761603
12	hsa-miR-20b	2.29816	0.0344	0.761603
13	hsa-miR-361-3p	2.15331	0.045817	0.761603
14	hsa-miR-27a*	2.7785	0.012802	0.761603
15	hsa-miR-302e	-2.24886	0.037951	0.761603
16	hsa-miR-151-3p	2.33597	0.031888	0.761603
17	hsa-miR-363	2.48115	0.023752	0.761603
18	hsa-miR-19a	2.12083	0.048814	0.761603
19	hsa-miR-502-5p	2.53394	0.021312	0.761603
20	hsa-miR-92a-1*	2.52462	0.021725	0.761603
21	hsa-miR-892b	-2.42515	0.026627	0.761603
22	hsa-miR-302d*	2.60396	0.018441	0.761603
23	hsa-miR-18b	2.73578	0.014006	0.761603
24	hsa-miR-1288	-2.56095	0.020158	0.761603
25	hsa-let-7i	-2.01936	0.059368	0.761603

## Sheet: Table S4b
Supplementary Table 4b
MicroRNAs differential expressed between leukemia of ambiguous lineage, AML, B-ALL and T-ALL samples analyzed by LIMMA.
#	GeneName	t-statistic values AmbigALvsAML-TvsAML	p-values AmbigALvsAML-TvsAML	False Discovery Rate AmbigALvsAML-TvsAML
1	hsa-miR-513a-5p	-5.15731	7.7e-05	0.051812
2	hsa-miR-29c	-5.48707	3.9e-05	0.051812
3	hsa-miR-3923	-4.23626	0.000547	0.128627
4	hsa-miR-494	-4.22893	0.000556	0.128627
5	hsa-miR-3926	-4.21498	0.000573	0.128627
6	hsa-miR-1972	-4.52167	0.000296	0.128627
7	hsa-miR-663	-4.0095	0.000895	0.172247
8	kshv-miR-K12-5*	-3.79583	0.001425	0.240014
9	hsa-miR-29c*	-3.72578	0.001661	0.24345
10	hsa-miR-148a	-3.68693	0.001807	0.24345
11	hsa-miR-3683	3.57738	0.002295	0.257571
12	hsa-miR-628-5p	3.61221	0.002127	0.257571
13	hsa-miR-3196	-3.46503	0.00293	0.291099
14	hsa-miR-15b*	-3.4503	0.003026	0.291099
15	hsa-miR-4259	-3.39426	0.003417	0.306876
16	hsa-miR-146a	3.25034	0.004668	0.392993
17	hsa-miR-664*	-3.16237	0.005645	0.447244
18	hsa-miR-1288	-3.05305	0.00714	0.470665
19	hsa-miR-222	2.91322	0.009625	0.470665
20	hsa-miR-15a*	-2.92256	0.009436	0.470665
21	hsa-miR-345	-2.91925	0.009503	0.470665
22	hsa-miR-4262	3.05704	0.007079	0.470665
23	hsa-miR-941	3.00811	0.007861	0.470665
24	hsa-miR-4261	-2.95911	0.008729	0.470665
25	hsa-miR-7-1*	-3.03601	0.007406	0.470665

## Sheet: Table S4c
Supplementary Table 4c
MicroRNAs differential expressed between leukemia of ambiguous lineage, AML, B-ALL and T-ALL samples analyzed by LIMMA.
#	GeneName	t-statistic values AmbigALvsAML-BvsAML	p-values AmbigALvsAML-BvsAML	False Discovery Rate AmbigALvsAML-BvsAML
1	hsa-miR-320a	-7.14691	2e-06	0.002099
2	hsa-miR-320c	-5.94655	1.5e-05	0.010368
3	hsa-miR-320b	-4.96537	0.000115	0.051651
4	hsa-miR-320e	-4.67053	0.000215	0.057914
5	hsa-miR-320d	-4.73679	0.000187	0.057914
6	hsa-miR-151-5p	-3.91265	0.001105	0.156747
7	hsa-miR-611	-3.60583	0.002157	0.156747
8	hsa-let-7g	-3.95133	0.001016	0.156747
9	hsv2-miR-H7-3p	-3.70342	0.001744	0.156747
10	hsa-miR-204	-3.83732	0.001302	0.156747
11	hsa-miR-3653	-3.88742	0.001168	0.156747
12	hsa-miR-3118	-3.59442	0.002211	0.156747
13	hsa-miR-30a	-3.76983	0.001509	0.156747
14	hsa-miR-1237	-3.60096	0.00218	0.156747
15	hsa-miR-30b	-3.71239	0.00171	0.156747
16	hsv1-miR-H6-3p	-3.5965	0.002201	0.156747
17	hsa-let-7f-1*	-3.61708	0.002105	0.156747
18	hsa-miR-1225-3p	-3.65637	0.001932	0.156747
19	hsa-let-7b*	-3.81106	0.001379	0.156747
20	hsa-miR-4313	-3.56832	0.00234	0.157621
21	hsa-miR-4305	-3.46439	0.002934	0.165389
22	ebv-miR-BART13	-3.36895	0.00361	0.165389
23	hsa-miR-29a	-3.44481	0.003062	0.165389
24	hsa-miR-324-3p	-3.2877	0.004306	0.165389
25	hsa-miR-4295	-3.41782	0.003247	0.165389

## Sheet: Table S4d
Supplementary Table 4d
MicroRNAs differential expressed between leukemia of ambiguous lineage, AML, B-ALL and T-ALL samples analyzed by LIMMA.
GeneName	t-statistic values TvsAML - BvsAML	p-values TvsAML - BvsAML	False Discovery Rate TvsAML - BvsAML
hsa-miR-513a-5p	5.17335	0.000556	0.044081
hsa-miR-320c	-5.08022	0.000632	0.047263
hsa-miR-29c	4.68599	0.001096	0.060674
hsa-miR-320e	-3.45461	0.007057	0.163881
hsa-miR-320d	-3.23979	0.009959	0.200161
hsa-miR-320a	-3.18686	0.010849	0.202963
hsa-miR-320b	-2.98636	0.015036	0.22756
